# Supplementary material for: On the primary event of phytochrome: quantum chemical comparison of photoreactions at C4, C10 and C15
Source: Royal Society of Chemistry journal article supplement (doi:10.1039/b811813b), 2009-01-01
Supplement: b811813b.pdf [file b811813b.pdf]

## Supplementary information

### **On the primary event of phytochrome: quantum chemical comparison of photoreactions at C<sub>4</sub>, C<sub>10</sub> and C<sub>15</sub>**

**Bo Durbeej**

*Department of Chemistry, University of Siena, Via Aldo Moro 2, I-53100 Siena, Italy*

*Department of Physical and Analytical Chemistry, Quantum Chemistry, Uppsala University, Box 518, SE-75120 Uppsala, Sweden*

*E-mail: bo.durbeej@kvac.uu.se; Fax and Tel: +39-(0)577-234278*

## 1. Population analysis

**Table S1** Difference in  $S_1$  and  $S_0$  charges ( $\Delta q$ , elementary charge units) of the pyrrole rings along the  $Z \rightarrow E$  isomerization paths of  $ZaZsZa$  PΦB<sup>a</sup>

| $ZaZsZa$ PΦB                           | Dihedral = $-45^\circ$ | Minimum       | Dihedral = $45^\circ$ |
|----------------------------------------|------------------------|---------------|-----------------------|
| $Z \rightarrow E$ isomerization at C4  |                        |               |                       |
| $\Delta q(\text{ring A})$              | -0.01 (-0.01)          | -0.02 (-0.02) | -0.00 (-0.01)         |
| $\Delta q(\text{ring B})$              | 0.03 (0.04)            | 0.03 (0.04)   | 0.04 (0.04)           |
| $\Delta q(\text{ring C})$              | 0.01 (-0.00)           | 0.02 (0.01)   | -0.01 (-0.00)         |
| $\Delta q(\text{ring D})$              | -0.03 (-0.03)          | -0.03 (-0.03) | -0.03 (-0.03)         |
| $Z \rightarrow E$ isomerization at C10 |                        |               |                       |
| $\Delta q(\text{ring A})$              | 0.02 (0.02)            | -0.02 (-0.02) | 0.04 (0.03)           |
| $\Delta q(\text{ring B})$              | 0.09 (0.09)            | 0.03 (0.04)   | 0.10 (0.12)           |
| $\Delta q(\text{ring C})$              | -0.04 (-0.04)          | 0.02 (0.01)   | -0.04 (-0.07)         |
| $\Delta q(\text{ring D})$              | -0.07 (-0.07)          | -0.03 (-0.03) | -0.10 (-0.08)         |
| $Z \rightarrow E$ isomerization at C15 |                        |               |                       |
| $\Delta q(\text{ring A})$              | -0.02 (-0.02)          | -0.02 (-0.02) | -0.02 (-0.02)         |
| $\Delta q(\text{ring B})$              | 0.04 (0.02)            | 0.03 (0.04)   | 0.03 (0.02)           |
| $\Delta q(\text{ring C})$              | -0.04 (0.00)           | 0.02 (0.01)   | -0.03 (0.00)          |
| $\Delta q(\text{ring D})$              | 0.02 (0.00)            | -0.03 (-0.03) | 0.02 (0.00)           |

<sup>a</sup> Atomic charges derived from standard Mulliken population analysis using HF/SVP and HF/6-311G(2df,p) for the ground state (on B3LYP/SVP geometries) and CIS/SVP and CIS/6-311G(2df,p) for the excited state (on TD-B3LYP/SVP geometries), with  $\Delta q$  values obtained with the 6-311G(2df,p) basis set given in parentheses.

$$q(\text{ring A}) = q(\text{C1}) + q(\text{C2}) + q(\text{C3}) + q(\text{C4}) + q(\text{NA}) + q(\text{O1}) + q(\text{C5}) / 2$$

$$q(\text{ring B}) = q(\text{C5}) / 2 + q(\text{C6}) + q(\text{C7}) + q(\text{C8}) + q(\text{C9}) + q(\text{NB}) + q(\text{C10}) / 2$$

$$q(\text{ring C}) = q(\text{C10}) / 2 + q(\text{C11}) + q(\text{C12}) + q(\text{C13}) + q(\text{C14}) + q(\text{NC}) + q(\text{C15}) / 2$$

$$q(\text{ring D}) = q(\text{C15}) / 2 + q(\text{C16}) + q(\text{C17}) + q(\text{C18}) + q(\text{C19}) + q(\text{ND}) + q(\text{O19}) + q(\text{C18}^1) + q(\text{C18}^2)$$

**Table S2**  $\Delta q$  of the pyrrole rings and vertical  $S_0 \rightarrow S_1$  excitation energies ( $\Delta E$ , eV) of  $Zs$  PΦB-BC at different rotations about the methine bridge<sup>a</sup>

| $Zs$ PΦB-BC                                          | C10–C11   |            |            |            |            |            |
|------------------------------------------------------|-----------|------------|------------|------------|------------|------------|
|                                                      | $0^\circ$ | $10^\circ$ | $20^\circ$ | $30^\circ$ | $40^\circ$ | $50^\circ$ |
| $\Delta q(\text{ring B}) = -\Delta q(\text{ring C})$ |           |            |            |            |            |            |
| HF/CIS                                               | -0.01     | -0.00      | 0.01       | 0.03       | 0.05       | 0.09       |
| CASSCF(12,11)                                        | -0.02     | -0.00      | 0.02       | 0.06       | 0.10       | 0.16       |
| SA-CASSCF(12,11) <sup>b</sup>                        | -0.02     | -0.00      | 0.03       | 0.06       | 0.11       | 0.18       |
| $\Delta E^c$                                         |           |            |            |            |            |            |
| CIS                                                  | 3.83      | 3.80       | 3.77       | 3.72       | 3.65       | 3.56       |
| TD-B3LYP                                             | 3.46      | 3.44       | 3.42       | 3.38       | 3.31       | 3.19       |
| CASSCF(12,11)                                        | 3.13      | 3.11       | 3.09       | 3.05       | 2.98       | 2.88       |
| SA-CASSCF(12,11) <sup>b</sup>                        | 3.16      | 3.15       | 3.12       | 3.09       | 3.02       | 2.93       |

<sup>a</sup> Atomic charges derived from standard Mulliken population analysis using HF( $S_0$ )/CIS( $S_1$ ) and CASSCF ( $S_0$  and  $S_1$ ) in combination with the SVP basis set and based on B3LYP/SVP ground-state geometries. The (12,11) active space in the CASSCF calculations includes the full  $\pi$  space of PΦB-BC (10 electrons in 10 orbitals) as well as the nitrogen lone pair and the corresponding nonbonding orbital.

$$q(\text{ring B}) = q(\text{C6}) + q(\text{C7}) + q(\text{C8}) + q(\text{C9}) + q(\text{NB}) + q(\text{C10}) / 2$$

$$q(\text{ring C}) = q(\text{C10}) / 2 + q(\text{C11}) + q(\text{C12}) + q(\text{C13}) + q(\text{C14}) + q(\text{NC})$$

<sup>b</sup> Two-root ( $S_0$  and  $S_1$ ) state-average (with equal weights) calculations for the excited state.

<sup>c</sup> All calculations carried out with the SVP basis set and based on B3LYP/SVP ground-state geometries.

## 2. Molecular structures

B3LYP/SVP  $S_0$  structure of *ZaZsZa PΦB*

|   |           |           |           |
|---|-----------|-----------|-----------|
| N | 5.331373  | 0.419788  | 0.021789  |
| C | 4.311182  | -0.503665 | 0.005642  |
| C | 4.937211  | -1.817352 | -0.054363 |
| C | 6.294675  | -1.685705 | -0.077370 |
| C | 6.591019  | -0.203641 | -0.057351 |
| C | 2.953830  | -0.274556 | 0.041707  |
| C | 2.281881  | 0.973484  | 0.187737  |
| C | 2.741230  | 2.271251  | 0.554689  |
| C | 1.663364  | 3.141037  | 0.499112  |
| C | 0.507328  | 2.401653  | 0.130787  |
| N | 0.927939  | 1.081202  | -0.022742 |
| C | -0.796450 | 2.885425  | -0.024871 |
| C | -2.000453 | 2.193331  | -0.163133 |
| C | -3.265023 | 2.725484  | -0.536567 |
| C | -4.184685 | 1.690114  | -0.570527 |
| C | -3.517132 | 0.490170  | -0.183681 |
| N | -2.201124 | 0.822452  | 0.016158  |
| C | -3.971803 | -0.851513 | -0.005658 |
| C | -5.265732 | -1.304371 | 0.052553  |
| N | -6.412887 | -0.569528 | 0.023466  |
| C | -7.608493 | -1.321598 | 0.087078  |
| C | -7.191820 | -2.785787 | 0.113281  |
| C | -5.655476 | -2.768208 | 0.186761  |
| O | -8.702469 | -0.833196 | 0.108406  |
| C | 7.291224  | -2.735126 | -0.117413 |
| C | 8.624054  | -2.538318 | -0.137714 |
| O | 7.641856  | 0.385153  | -0.105750 |
| H | -5.219175 | 1.774888  | -0.892874 |
| H | -3.443520 | 3.767519  | -0.797198 |
| H | 3.747278  | 2.523837  | 0.878721  |
| H | 1.666268  | 4.202520  | 0.741664  |
| H | 4.370097  | -2.747725 | -0.056425 |
| H | 0.398540  | 0.372958  | -0.518289 |
| H | -1.559710 | 0.217633  | 0.516285  |
| H | -0.885663 | 3.974389  | -0.038943 |
| H | 2.326107  | -1.163532 | -0.057594 |
| H | 5.237544  | 1.422609  | -0.077822 |
| H | 6.896137  | -3.756759 | -0.131402 |
| H | 9.307990  | -3.389896 | -0.168636 |
| H | 9.053514  | -1.534748 | -0.125521 |
| H | -3.199795 | -1.617302 | 0.106308  |
| H | -5.280056 | -3.157943 | 1.146939  |
| H | -5.176911 | -3.364076 | -0.604850 |
| H | -6.457531 | 0.444286  | 0.034412  |
| H | -7.576360 | -3.271869 | -0.797088 |
| H | -7.676555 | -3.282494 | 0.966207  |

Supplementary Material (ESI) for *PCCP*  
This journal is © the Owner Societies 2009

TD-B3LYP/SVP S<sub>1</sub> structure of *ZaZsZa* PΦB

|   |           |           |           |
|---|-----------|-----------|-----------|
| C | -5.430699 | -2.798924 | 0.315735  |
| C | -5.120480 | -1.324578 | 0.118824  |
| N | -6.304025 | -0.656916 | 0.024208  |
| C | -7.458200 | -1.471468 | 0.087483  |
| C | -6.961288 | -2.907351 | 0.195150  |
| C | -3.847433 | -0.795844 | 0.069820  |
| C | -3.452975 | 0.546815  | -0.172876 |
| C | -4.168067 | 1.700933  | -0.628220 |
| C | -3.297531 | 2.772167  | -0.662744 |
| C | -1.999319 | 2.314680  | -0.249612 |
| N | -2.143616 | 0.946535  | 0.004062  |
| C | -0.829225 | 3.045130  | -0.127706 |
| C | 0.487390  | 2.532199  | 0.133188  |
| C | 1.606166  | 3.197210  | 0.667338  |
| C | 2.679204  | 2.286445  | 0.694671  |
| C | 2.227122  | 1.063145  | 0.169987  |
| N | 0.878983  | 1.230375  | -0.127056 |
| C | 2.866706  | -0.201753 | -0.046027 |
| C | 4.216401  | -0.484040 | -0.048013 |
| N | 5.275564  | 0.396046  | 0.090538  |
| C | 6.509251  | -0.262434 | 0.025639  |
| C | 6.162061  | -1.722058 | -0.136295 |
| C | 4.787231  | -1.804845 | -0.188078 |
| C | 7.105577  | -2.803841 | -0.229745 |
| C | 8.457065  | -2.663716 | -0.180065 |
| O | 7.591990  | 0.274189  | 0.082940  |
| O | -8.578469 | -1.045334 | 0.052363  |
| H | -5.205773 | 1.723477  | -0.953500 |
| H | -3.517419 | 3.788246  | -0.986542 |
| H | 3.663617  | 2.478895  | 1.115532  |
| H | 1.611868  | 4.225422  | 1.023760  |
| H | 4.191819  | -2.711632 | -0.298316 |
| H | 0.370303  | 0.613064  | -0.751611 |
| H | -1.477340 | 0.414286  | 0.553584  |
| H | -0.916907 | 4.129272  | -0.221681 |
| H | 2.212521  | -1.057074 | -0.239098 |
| H | 5.214408  | 1.407076  | 0.092588  |
| H | 6.675546  | -3.804701 | -0.350448 |
| H | 9.106659  | -3.539329 | -0.258284 |
| H | 8.919333  | -1.680697 | -0.063143 |
| H | -3.040739 | -1.513074 | 0.248697  |
| H | -5.067716 | -3.120351 | 1.306869  |
| H | -4.892931 | -3.407966 | -0.427542 |
| H | -6.404050 | 0.352836  | -0.016835 |
| H | -7.286912 | -3.454923 | -0.703934 |
| H | -7.446540 | -3.393184 | 1.054520  |

Supplementary Material (ESI) for *PCCP*  
This journal is © the Owner Societies 2009

TD-B3LYP/SVP S<sub>2</sub> structure of *ZaZsZa* PΦB

|   |           |           |           |
|---|-----------|-----------|-----------|
| C | -5.544404 | -2.802230 | 0.223763  |
| C | -5.179294 | -1.334953 | 0.065766  |
| N | -6.340183 | -0.615579 | 0.030907  |
| C | -7.520840 | -1.382753 | 0.110243  |
| C | -7.081934 | -2.841581 | 0.152527  |
| C | -3.897829 | -0.844642 | -0.009089 |
| C | -3.484733 | 0.510055  | -0.218205 |
| C | -4.166895 | 1.666503  | -0.670693 |
| C | -3.272092 | 2.736856  | -0.653562 |
| C | -2.011927 | 2.256536  | -0.211096 |
| N | -2.174176 | 0.892619  | 0.012865  |
| C | -0.817531 | 2.980965  | -0.025920 |
| C | 0.480326  | 2.482062  | 0.164238  |
| C | 1.644431  | 3.193942  | 0.571492  |
| C | 2.710148  | 2.302080  | 0.613090  |
| C | 2.238873  | 1.024734  | 0.212447  |
| N | 0.877521  | 1.159035  | -0.011559 |
| C | 2.890867  | -0.232854 | 0.047981  |
| C | 4.240153  | -0.499011 | 0.004645  |
| N | 5.303159  | 0.386304  | 0.029960  |
| C | 6.558315  | -0.249859 | -0.037651 |
| C | 6.236062  | -1.699586 | -0.092256 |
| C | 4.851318  | -1.819790 | -0.068571 |
| C | 7.193169  | -2.766310 | -0.168913 |
| C | 8.550928  | -2.590283 | -0.193111 |
| O | 7.627459  | 0.323446  | -0.054742 |
| O | -8.625092 | -0.913479 | 0.130971  |
| H | -5.189908 | 1.705624  | -1.038465 |
| H | -3.469324 | 3.760329  | -0.967570 |
| H | 3.715332  | 2.533466  | 0.958972  |
| H | 1.660026  | 4.247026  | 0.846715  |
| H | 4.281251  | -2.749512 | -0.090771 |
| H | 0.345859  | 0.493275  | -0.561328 |
| H | -1.541750 | 0.345759  | 0.587138  |
| H | -0.914072 | 4.068316  | -0.035522 |
| H | 2.244009  | -1.108477 | -0.059741 |
| H | 5.232147  | 1.398219  | -0.003436 |
| H | 6.786711  | -3.782864 | -0.213034 |
| H | 9.218448  | -3.453706 | -0.244097 |
| H | 8.985354  | -1.588065 | -0.163948 |
| H | -3.102217 | -1.584500 | 0.118915  |
| H | -5.164172 | -3.174051 | 1.190006  |
| H | -5.060275 | -3.406224 | -0.558978 |
| H | -6.393732 | 0.398834  | 0.028080  |
| H | -7.460584 | -3.343307 | -0.752343 |
| H | -7.558954 | -3.335817 | 1.011616  |

Supplementary Material (ESI) for *PCCP*  
This journal is © the Owner Societies 2009

B3LYP/TZVP S<sub>0</sub> structure of *ZaZsZa* PΦB

|   |           |           |           |
|---|-----------|-----------|-----------|
| N | 5.319574  | 0.430849  | 0.037333  |
| C | 4.307110  | -0.501272 | 0.023059  |
| C | 4.943726  | -1.804030 | -0.034418 |
| C | 6.292061  | -1.665750 | -0.075335 |
| C | 6.580679  | -0.186009 | -0.071748 |
| C | 2.957048  | -0.284473 | 0.066028  |
| C | 2.281340  | 0.954758  | 0.211328  |
| C | 2.724490  | 2.246043  | 0.589572  |
| C | 1.648064  | 3.107314  | 0.525984  |
| C | 0.503762  | 2.372988  | 0.141136  |
| N | 0.927659  | 1.052500  | -0.007909 |
| C | -0.791554 | 2.853697  | -0.025467 |
| C | -1.988176 | 2.167423  | -0.175177 |
| C | -3.240122 | 2.697813  | -0.564447 |
| C | -4.160627 | 1.671959  | -0.607603 |
| C | -3.511103 | 0.474584  | -0.210836 |
| N | -2.193535 | 0.795637  | -0.001866 |
| C | -3.972586 | -0.858694 | -0.034964 |
| C | -5.261800 | -1.295655 | 0.036566  |
| N | -6.400969 | -0.549793 | 0.026506  |
| C | -7.600636 | -1.289489 | 0.107964  |
| C | -7.201974 | -2.755176 | 0.118518  |
| C | -5.664919 | -2.754125 | 0.168248  |
| O | -8.688756 | -0.789720 | 0.151472  |
| C | 7.286183  | -2.710528 | -0.116804 |
| C | 8.611403  | -2.519605 | -0.145612 |
| O | 7.624805  | 0.408738  | -0.151647 |
| H | -5.178293 | 1.760827  | -0.947562 |
| H | -3.410049 | 3.729175  | -0.830923 |
| H | 3.714009  | 2.499485  | 0.929243  |
| H | 1.645424  | 4.156821  | 0.775146  |
| H | 4.388909  | -2.730207 | -0.022174 |
| H | 0.421796  | 0.361571  | -0.540069 |
| H | -1.579586 | 0.204294  | 0.536356  |
| H | -0.879223 | 3.933533  | -0.038948 |
| H | 2.339086  | -1.169661 | -0.027828 |
| H | 5.216197  | 1.421257  | -0.110553 |
| H | 6.893727  | -3.722915 | -0.123344 |
| H | 9.284281  | -3.366529 | -0.176256 |
| H | 9.048133  | -1.530550 | -0.140980 |
| H | -3.212010 | -1.624834 | 0.061759  |
| H | -5.287835 | -3.150419 | 1.113152  |
| H | -5.215120 | -3.344532 | -0.630135 |
| H | -6.434657 | 0.458557  | 0.051925  |
| H | -7.597107 | -3.226293 | -0.782613 |
| H | -7.669387 | -3.246726 | 0.970784  |

Supplementary Material (ESI) for *PCCP*  
This journal is © the Owner Societies 2009

TD-B3LYP/TZVP S<sub>1</sub> structure of *ZaZsZa* PΦB

|   |           |           |           |
|---|-----------|-----------|-----------|
| C | 4.797959  | -1.784606 | -0.212774 |
| C | 4.217738  | -0.477634 | -0.052824 |
| N | 5.268379  | 0.405051  | 0.126038  |
| C | 6.504934  | -0.246189 | 0.050463  |
| C | 6.164735  | -1.698894 | -0.146156 |
| C | 2.874963  | -0.203637 | -0.066300 |
| C | 2.228988  | 1.047601  | 0.165743  |
| C | 2.655194  | 2.252569  | 0.728693  |
| C | 1.577733  | 3.151845  | 0.708828  |
| C | 0.481031  | 2.500848  | 0.138621  |
| N | 0.881081  | 1.207542  | -0.144657 |
| C | -0.827826 | 3.014172  | -0.143189 |
| C | -1.987766 | 2.289979  | -0.274145 |
| C | -3.278088 | 2.744249  | -0.697797 |
| C | -4.149065 | 1.683647  | -0.660453 |
| C | -3.449539 | 0.532366  | -0.193044 |
| N | -2.135704 | 0.920562  | -0.019179 |
| C | -3.848829 | -0.800868 | 0.051602  |
| C | -5.117869 | -1.315870 | 0.114098  |
| C | -5.438702 | -2.785787 | 0.312217  |
| C | -6.971772 | -2.879907 | 0.213490  |
| C | -7.453739 | -1.442290 | 0.114227  |
| N | -6.295375 | -0.638452 | 0.034715  |
| O | -8.570315 | -1.005512 | 0.095497  |
| O | 7.583701  | 0.294572  | 0.124446  |
| C | 7.104147  | -2.775236 | -0.252990 |
| C | 8.448048  | -2.645933 | -0.185972 |
| H | -5.172923 | 1.709128  | -0.995447 |
| H | -3.490023 | 3.747504  | -1.032540 |
| H | 3.618063  | 2.441318  | 1.173870  |
| H | 1.571472  | 4.159862  | 1.090845  |
| H | 4.214080  | -2.683777 | -0.346406 |
| H | 0.402700  | 0.622348  | -0.813659 |
| H | -1.493617 | 0.406112  | 0.565178  |
| H | -0.908736 | 4.088117  | -0.248990 |
| H | 2.232584  | -1.049847 | -0.285560 |
| H | 5.203886  | 1.410232  | 0.122991  |
| H | 6.676078  | -3.762682 | -0.400479 |
| H | 9.085197  | -3.516182 | -0.277643 |
| H | 8.918739  | -1.682503 | -0.041983 |
| H | -3.051447 | -1.517125 | 0.219748  |
| H | -5.073122 | -3.110535 | 1.289762  |
| H | -4.928119 | -3.392556 | -0.437010 |
| H | -6.386957 | 0.366827  | 0.004791  |
| H | -7.307668 | -3.418563 | -0.674440 |
| H | -7.439596 | -3.355631 | 1.074990  |

Supplementary Material (ESI) for *PCCP*  
This journal is © the Owner Societies 2009

B3LYP/SVP S<sub>0</sub> structure of ZsZsZa PΦB

|   |           |           |           |
|---|-----------|-----------|-----------|
| C | 4.343829  | 3.446571  | 0.369546  |
| C | 4.030870  | 1.993024  | 0.061991  |
| N | 2.681271  | 1.915812  | -0.204341 |
| C | 1.962859  | 3.105516  | -0.025551 |
| C | 2.966412  | 4.135350  | 0.476678  |
| C | 4.903209  | 0.941393  | 0.039898  |
| C | 4.560257  | -0.438892 | -0.143368 |
| C | 5.408252  | -1.527490 | -0.462395 |
| C | 4.643684  | -2.689529 | -0.451464 |
| C | 3.304618  | -2.342218 | -0.139973 |
| N | 3.285397  | -0.947284 | 0.008520  |
| C | 2.187582  | -3.173789 | -0.000838 |
| C | 0.845343  | -2.804603 | 0.126031  |
| C | -0.262250 | -3.605118 | 0.522857  |
| C | -1.393582 | -2.805272 | 0.555687  |
| C | -1.021138 | -1.489688 | 0.145830  |
| N | 0.335092  | -1.520336 | -0.068343 |
| C | -1.751683 | -0.281294 | -0.030506 |
| C | -3.119086 | -0.109117 | -0.039052 |
| N | -4.101592 | -1.067363 | 0.040549  |
| C | -5.385853 | -0.492028 | -0.027369 |
| C | -5.144001 | 0.998038  | -0.115744 |
| C | -3.792015 | 1.178644  | -0.133834 |
| C | -6.178009 | 2.009280  | -0.171660 |
| C | -7.503294 | 1.765495  | -0.153777 |
| O | -6.414560 | -1.119676 | -0.020914 |
| O | 0.780397  | 3.206594  | -0.232011 |
| H | 6.469402  | -1.442159 | -0.687343 |
| H | 4.984489  | -3.698536 | -0.678608 |
| H | -2.379993 | -3.114205 | 0.891601  |
| H | -0.197004 | -4.655015 | 0.804237  |
| H | -3.255457 | 2.125418  | -0.189691 |
| H | 0.805185  | -0.812676 | -0.618630 |
| H | 2.609325  | -0.496474 | 0.618043  |
| H | 2.391542  | -4.246781 | 0.024806  |
| H | -1.165814 | 0.631437  | -0.173038 |
| H | -3.974086 | -2.069988 | -0.012661 |
| H | -5.819657 | 3.042525  | -0.233466 |
| H | -8.217483 | 2.591069  | -0.200968 |
| H | -7.896943 | 0.749009  | -0.094177 |
| H | 5.964297  | 1.162809  | 0.166396  |
| H | 4.945250  | 3.868560  | -0.453079 |
| H | 4.949902  | 3.535629  | 1.282466  |
| H | 2.247690  | 1.125932  | -0.668054 |
| H | 2.701074  | 4.402249  | 1.512497  |
| H | 2.874381  | 5.054398  | -0.119561 |



Supplementary Material (ESI) for *PCCP*  
This journal is © the Owner Societies 2009

TD-B3LYP/SVP S<sub>1</sub> structure of ZsZsZa PΦB

|   |           |           |           |
|---|-----------|-----------|-----------|
| N | 2.289936  | 1.894014  | -0.086507 |
| C | 3.615312  | 2.180852  | 0.130747  |
| C | 3.712799  | 3.667699  | 0.416326  |
| C | 2.248890  | 4.162187  | 0.470918  |
| C | 1.405040  | 2.964868  | 0.053890  |
| C | 4.646385  | 1.267006  | 0.062391  |
| C | 4.509050  | -0.133043 | -0.126479 |
| C | 5.497967  | -1.097255 | -0.495386 |
| C | 4.900723  | -2.340406 | -0.560142 |
| C | 3.506448  | -2.193712 | -0.228707 |
| N | 3.306892  | -0.814746 | -0.005156 |
| C | 2.502460  | -3.132810 | -0.130625 |
| C | 1.109923  | -2.822473 | 0.119656  |
| C | 0.111137  | -3.564051 | 0.761398  |
| C | -1.072319 | -2.785245 | 0.768543  |
| C | -0.798052 | -1.574118 | 0.122228  |
| N | 0.542829  | -1.607901 | -0.235991 |
| C | -1.567932 | -0.378025 | -0.122504 |
| C | -2.933300 | -0.234942 | -0.106536 |
| C | -3.628398 | 1.026937  | -0.258524 |
| C | -4.987134 | 0.813569  | -0.185597 |
| C | -5.192918 | -0.671213 | 0.005564  |
| N | -3.903193 | -1.209204 | 0.061128  |
| O | -6.220798 | -1.303322 | 0.089098  |
| C | -6.029392 | 1.799859  | -0.281124 |
| C | -7.361228 | 1.533275  | -0.209603 |
| O | 0.213319  | 2.873012  | -0.128502 |
| H | 6.537807  | -0.859035 | -0.714883 |
| H | 5.370659  | -3.280636 | -0.844895 |
| H | -2.004409 | -3.051998 | 1.262645  |
| H | 0.247138  | -4.544901 | 1.213122  |
| H | -3.114126 | 1.980365  | -0.387511 |
| H | 0.922761  | -1.032887 | -0.980782 |
| H | 2.606925  | -0.528228 | 0.674833  |
| H | 2.780023  | -4.186266 | -0.202440 |
| H | -1.007800 | 0.542519  | -0.321409 |
| H | -3.743860 | -2.209551 | 0.088572  |
| H | -5.697216 | 2.834548  | -0.422584 |
| H | -8.091830 | 2.342264  | -0.290167 |
| H | -7.725757 | 0.512678  | -0.072401 |
| H | 5.664203  | 1.655399  | 0.136960  |
| H | 4.285260  | 4.162240  | -0.387094 |
| H | 4.265959  | 3.851244  | 1.350464  |
| H | 1.961655  | 1.002217  | -0.438975 |
| H | 1.937090  | 4.476569  | 1.480203  |
| H | 2.037342  | 5.007048  | -0.201359 |

Supplementary Material (ESI) for *PCCP*  
This journal is © the Owner Societies 2009

TD-B3LYP/SVP S<sub>2</sub> structure of ZsZsZa PΦB

|   |           |           |           |
|---|-----------|-----------|-----------|
| C | -3.657730 | 1.077305  | -0.158747 |
| C | -2.945365 | -0.203613 | -0.042225 |
| N | -3.945456 | -1.155818 | 0.015739  |
| C | -5.243406 | -0.606320 | -0.048299 |
| C | -5.021344 | 0.860626  | -0.154392 |
| C | -1.590400 | -0.368976 | -0.002744 |
| C | -0.836983 | -1.577516 | 0.186305  |
| C | -1.154352 | -2.866558 | 0.666045  |
| C | 0.010939  | -3.644078 | 0.641917  |
| C | 1.071490  | -2.835390 | 0.164645  |
| N | 0.521257  | -1.580857 | -0.076584 |
| C | 2.441852  | -3.142832 | -0.022043 |
| C | 3.475826  | -2.210923 | -0.195257 |
| C | 4.836979  | -2.407597 | -0.556580 |
| C | 5.478461  | -1.167286 | -0.541388 |
| C | 4.536241  | -0.180769 | -0.175502 |
| N | 3.313056  | -0.829067 | -0.008977 |
| C | 4.711412  | 1.229087  | 0.003779  |
| C | 3.713027  | 2.168107  | 0.058831  |
| C | 3.830639  | 3.650732  | 0.361850  |
| C | 2.371628  | 4.135496  | 0.527705  |
| C | 1.507084  | 2.972500  | 0.054702  |
| N | 2.375918  | 1.909554  | -0.171061 |
| O | 0.307857  | 2.904913  | -0.095446 |
| O | -6.267296 | -1.253134 | -0.025779 |
| C | -6.058199 | 1.854934  | -0.252270 |
| C | -7.396834 | 1.581740  | -0.245851 |
| H | 6.518183  | -0.968296 | -0.796463 |
| H | 5.275077  | -3.367357 | -0.825063 |
| H | -2.117417 | -3.186264 | 1.059782  |
| H | 0.115334  | -4.673553 | 0.979864  |
| H | -3.144483 | 2.038200  | -0.226143 |
| H | 0.950416  | -0.922677 | -0.716329 |
| H | 2.643209  | -0.498878 | 0.681351  |
| H | 2.718580  | -4.198352 | -0.011398 |
| H | -1.012275 | 0.553878  | -0.125614 |
| H | -3.804813 | -2.161866 | 0.034426  |
| H | -5.724942 | 2.894886  | -0.338639 |
| H | -8.125263 | 2.392682  | -0.320449 |
| H | -7.759690 | 0.554319  | -0.167989 |
| H | 5.739972  | 1.584166  | 0.096851  |
| H | 4.330067  | 4.159373  | -0.480984 |
| H | 4.452525  | 3.829089  | 1.251360  |
| H | 2.043523  | 1.045504  | -0.583015 |
| H | 2.111038  | 4.356266  | 1.576144  |
| H | 2.127245  | 5.035945  | -0.054598 |

Supplementary Material (ESI) for *PCCP*  
This journal is © the Owner Societies 2009

B3LYP/TZVP S<sub>0</sub> structure of ZsZsZa PΦB

|   |           |           |           |
|---|-----------|-----------|-----------|
| C | 4.953076  | 3.124516  | 0.360621  |
| C | 4.378070  | 1.753419  | 0.061173  |
| N | 3.035132  | 1.915734  | -0.183244 |
| C | 2.557719  | 3.227333  | -0.040739 |
| C | 3.731487  | 4.060904  | 0.444103  |
| C | 5.063994  | 0.582429  | 0.024076  |
| C | 4.534014  | -0.727489 | -0.166375 |
| C | 5.239069  | -1.899221 | -0.504701 |
| C | 4.352145  | -2.959170 | -0.486506 |
| C | 3.071655  | -2.470581 | -0.151539 |
| N | 3.207573  | -1.079155 | -0.003131 |
| C | 1.896906  | -3.198032 | -0.002015 |
| C | 0.586706  | -2.759603 | 0.148810  |
| C | -0.540225 | -3.524364 | 0.532880  |
| C | -1.640249 | -2.694783 | 0.585114  |
| C | -1.232572 | -1.391267 | 0.200989  |
| N | 0.123823  | -1.453176 | -0.009916 |
| C | -1.935535 | -0.170573 | 0.045153  |
| C | -3.290966 | 0.018650  | 0.007863  |
| N | -4.285634 | -0.930595 | 0.040901  |
| C | -5.558470 | -0.336445 | -0.069621 |
| C | -5.294891 | 1.148067  | -0.096295 |
| C | -3.948850 | 1.309863  | -0.064027 |
| C | -6.306257 | 2.175274  | -0.148005 |
| C | -7.628318 | 1.961650  | -0.169200 |
| O | -6.591936 | -0.950590 | -0.134530 |
| O | 1.420452  | 3.548316  | -0.264801 |
| H | 6.289227  | -1.934843 | -0.744861 |
| H | 4.570458  | -3.989161 | -0.721717 |
| H | -2.624186 | -2.975598 | 0.919493  |
| H | -0.508970 | -4.571641 | 0.789509  |
| H | -3.407847 | 2.244275  | -0.069391 |
| H | 0.610958  | -0.753721 | -0.546423 |
| H | 2.614202  | -0.568108 | 0.635076  |
| H | 2.022880  | -4.274171 | 0.005088  |
| H | -1.337807 | 0.727150  | -0.062755 |
| H | -4.166686 | -1.921411 | -0.091401 |
| H | -5.930524 | 3.193687  | -0.170103 |
| H | -8.315399 | 2.796700  | -0.209100 |
| H | -8.048567 | 0.965665  | -0.149269 |
| H | 6.138745  | 0.639057  | 0.136777  |
| H | 5.626476  | 3.416678  | -0.448359 |
| H | 5.541354  | 3.106503  | 1.277355  |
| H | 2.459174  | 1.218619  | -0.630102 |
| H | 3.523561  | 4.390454  | 1.463727  |
| H | 3.817494  | 4.954926  | -0.171736 |

Supplementary Material (ESI) for *PCCP*  
This journal is © the Owner Societies 2009

TD-B3LYP/TZVP S<sub>1</sub> structure of ZsZsZa PΦB

|   |           |           |           |
|---|-----------|-----------|-----------|
| N | 2.555119  | 1.919508  | -0.100456 |
| C | 3.905838  | 2.018939  | 0.112549  |
| C | 4.208898  | 3.470346  | 0.420930  |
| C | 2.827562  | 4.151064  | 0.535591  |
| C | 1.829748  | 3.103093  | 0.070220  |
| C | 4.805611  | 0.988645  | 0.018938  |
| C | 4.509689  | -0.376702 | -0.172134 |
| C | 5.394808  | -1.429053 | -0.540667 |
| C | 4.688575  | -2.603558 | -0.593290 |
| C | 3.321123  | -2.331003 | -0.250594 |
| N | 3.243880  | -0.933982 | -0.047437 |
| C | 2.264380  | -3.188570 | -0.124701 |
| C | 0.900444  | -2.804423 | 0.150693  |
| C | -0.107814 | -3.498362 | 0.811923  |
| C | -1.264080 | -2.690614 | 0.814670  |
| C | -0.965575 | -1.504905 | 0.149255  |
| N | 0.374815  | -1.577251 | -0.213021 |
| C | -1.709197 | -0.306964 | -0.114673 |
| C | -3.064451 | -0.140975 | -0.094906 |
| C | -3.744854 | 1.116804  | -0.275478 |
| C | -5.099418 | 0.925129  | -0.201987 |
| C | -5.326141 | -0.547490 | 0.021847  |
| N | -4.043781 | -1.098269 | 0.111368  |
| O | -6.360667 | -1.166850 | 0.105033  |
| C | -6.118911 | 1.923746  | -0.322899 |
| C | -7.448820 | 1.691445  | -0.247734 |
| O | 0.641746  | 3.187892  | -0.121347 |
| H | 6.440987  | -1.292331 | -0.765889 |
| H | 5.063683  | -3.576354 | -0.869517 |
| H | -2.188046 | -2.922236 | 1.318611  |
| H | 0.000937  | -4.467866 | 1.270605  |
| H | -3.228334 | 2.053768  | -0.426991 |
| H | 0.766092  | -1.023890 | -0.960230 |
| H | 2.590887  | -0.582955 | 0.641050  |
| H | 2.469006  | -4.248509 | -0.199043 |
| H | -1.135996 | 0.585439  | -0.346764 |
| H | -3.899610 | -2.095572 | 0.122607  |
| H | -5.768575 | 2.938436  | -0.487627 |
| H | -8.151879 | 2.507911  | -0.349863 |
| H | -7.842157 | 0.696716  | -0.087069 |
| H | 5.854705  | 1.245803  | 0.090027  |
| H | 4.801073  | 3.898916  | -0.392574 |
| H | 4.805109  | 3.560490  | 1.329116  |
| H | 2.110989  | 1.106013  | -0.500081 |
| H | 2.581605  | 4.431675  | 1.561853  |
| H | 2.726163  | 5.046617  | -0.076196 |

Supplementary Material (ESI) for *PCCP*  
This journal is © the Owner Societies 2009

PBE0/SVP S<sub>0</sub> structure of *ZaZsZa* PΦB

|   |           |           |           |
|---|-----------|-----------|-----------|
| N | 5.294702  | 0.417076  | 0.017690  |
| C | 4.289708  | -0.513196 | 0.016557  |
| C | 4.925370  | -1.817710 | -0.039929 |
| C | 6.276706  | -1.669206 | -0.075145 |
| C | 6.553253  | -0.189384 | -0.069660 |
| C | 2.934998  | -0.297007 | 0.061586  |
| C | 2.264548  | 0.948802  | 0.207648  |
| C | 2.724797  | 2.236276  | 0.591029  |
| C | 1.653497  | 3.108042  | 0.527357  |
| C | 0.505699  | 2.375071  | 0.139883  |
| N | 0.921882  | 1.061897  | -0.018292 |
| C | -0.792192 | 2.860997  | -0.026975 |
| C | -1.990439 | 2.169044  | -0.175409 |
| C | -3.246250 | 2.698227  | -0.565319 |
| C | -4.160624 | 1.663763  | -0.606454 |
| C | -3.495015 | 0.472338  | -0.205220 |
| N | -2.189862 | 0.806309  | 0.007663  |
| C | -3.950497 | -0.865045 | -0.026892 |
| C | -5.245838 | -1.302054 | 0.042304  |
| N | -6.377114 | -0.553904 | 0.031956  |
| C | -7.574759 | -1.287477 | 0.105401  |
| C | -7.178642 | -2.748518 | 0.112681  |
| C | -5.651425 | -2.752586 | 0.172183  |
| O | -8.659250 | -0.787792 | 0.146250  |
| C | 7.285114  | -2.701819 | -0.115132 |
| C | 8.610410  | -2.478745 | -0.146907 |
| O | 7.593992  | 0.407724  | -0.133887 |
| H | -5.189714 | 1.742994  | -0.948089 |
| H | -3.421896 | 3.738677  | -0.834430 |
| H | 3.726451  | 2.480494  | 0.935620  |
| H | 1.655134  | 4.167385  | 0.779424  |
| H | 4.368858  | -2.754390 | -0.029541 |
| H | 0.397293  | 0.360307  | -0.526060 |
| H | -1.554328 | 0.206242  | 0.518676  |
| H | -0.880821 | 3.949977  | -0.041452 |
| H | 2.312173  | -1.189819 | -0.030730 |
| H | 5.186807  | 1.416105  | -0.093662 |
| H | 6.907993  | -3.729947 | -0.118616 |
| H | 9.310967  | -3.316422 | -0.176919 |
| H | 9.017396  | -1.465294 | -0.145226 |
| H | -3.184311 | -1.637303 | 0.076638  |
| H | -5.271960 | -3.149928 | 1.127093  |
| H | -5.185903 | -3.350635 | -0.624793 |
| H | -6.405670 | 0.459153  | 0.055118  |
| H | -7.579037 | -3.217879 | -0.799024 |
| H | -7.665137 | -3.247683 | 0.962422  |

Supplementary Material (ESI) for *PCCP*  
This journal is © the Owner Societies 2009

TD-PBE0/SVP S<sub>1</sub> structure of *ZaZsZa* PΦB

|   |           |           |           |
|---|-----------|-----------|-----------|
| C | 4.737546  | -1.797422 | -0.220920 |
| C | 4.176398  | -0.482281 | -0.064217 |
| N | 5.224314  | 0.387982  | 0.109084  |
| C | 6.452389  | -0.272853 | 0.051193  |
| C | 6.105729  | -1.721921 | -0.144432 |
| C | 2.826392  | -0.189656 | -0.084835 |
| C | 2.198763  | 1.063515  | 0.144837  |
| C | 2.658448  | 2.279631  | 0.689631  |
| C | 1.601815  | 3.190613  | 0.672274  |
| C | 0.476996  | 2.539788  | 0.126622  |
| N | 0.860536  | 1.246006  | -0.149774 |
| C | -0.825344 | 3.058302  | -0.120651 |
| C | -1.994122 | 2.321200  | -0.253367 |
| C | -3.286244 | 2.769898  | -0.663717 |
| C | -4.146725 | 1.691604  | -0.632660 |
| C | -3.421634 | 0.550841  | -0.182049 |
| N | -2.123468 | 0.961468  | -0.005058 |
| C | -3.798371 | -0.794350 | 0.057576  |
| C | -5.064891 | -1.328769 | 0.115331  |
| C | -5.365009 | -2.795906 | 0.307488  |
| C | -6.886033 | -2.908623 | 0.203555  |
| C | -7.388071 | -1.483612 | 0.108181  |
| N | -6.244623 | -0.667194 | 0.036134  |
| O | -8.507241 | -1.064581 | 0.086843  |
| O | 7.529027  | 0.260873  | 0.135953  |
| C | 7.050178  | -2.799164 | -0.239316 |
| C | 8.392998  | -2.655223 | -0.161759 |
| H | -5.182837 | 1.705887  | -0.963572 |
| H | -3.513811 | 3.784760  | -0.985112 |
| H | 3.640887  | 2.457475  | 1.121379  |
| H | 1.611275  | 4.212281  | 1.046511  |
| H | 4.139217  | -2.697935 | -0.358439 |
| H | 0.351346  | 0.645408  | -0.788029 |
| H | -1.450283 | 0.434678  | 0.539310  |
| H | -0.919176 | 4.143952  | -0.179600 |
| H | 2.173200  | -1.034453 | -0.319945 |
| H | 5.166956  | 1.397545  | 0.120311  |
| H | 6.623460  | -3.797392 | -0.385622 |
| H | 9.047742  | -3.526018 | -0.244156 |
| H | 8.848947  | -1.672788 | -0.017675 |
| H | -2.985550 | -1.506564 | 0.225088  |
| H | -4.988739 | -3.118553 | 1.292442  |
| H | -4.831201 | -3.398811 | -0.442527 |
| H | -6.346740 | 0.341266  | 0.001741  |
| H | -7.221164 | -3.452333 | -0.693371 |
| H | -7.362370 | -3.400250 | 1.063598  |

Supplementary Material (ESI) for *PCCP*  
This journal is © the Owner Societies 2009

PBE0/SVP S<sub>0</sub> structure of ZsZsZa PΦB

|   |           |           |           |
|---|-----------|-----------|-----------|
| C | 4.265384  | 3.447012  | 0.382340  |
| C | 3.982427  | 1.998696  | 0.065032  |
| N | 2.642556  | 1.898630  | -0.209667 |
| C | 1.906536  | 3.068054  | -0.024464 |
| C | 2.883495  | 4.103338  | 0.491841  |
| C | 4.870204  | 0.964599  | 0.039049  |
| C | 4.540611  | -0.413951 | -0.154033 |
| C | 5.393139  | -1.488761 | -0.489311 |
| C | 4.639785  | -2.653233 | -0.475849 |
| C | 3.306580  | -2.315806 | -0.148275 |
| N | 3.279461  | -0.930361 | 0.008641  |
| C | 2.198627  | -3.151902 | -0.000793 |
| C | 0.860776  | -2.783500 | 0.134790  |
| C | -0.238214 | -3.577317 | 0.551538  |
| C | -1.364338 | -2.776662 | 0.589342  |
| C | -0.992338 | -1.471900 | 0.160501  |
| N | 0.353293  | -1.507746 | -0.067209 |
| C | -1.721447 | -0.266748 | -0.020702 |
| C | -3.085767 | -0.105755 | -0.034678 |
| N | -4.055030 | -1.068357 | 0.038795  |
| C | -5.336773 | -0.507967 | -0.036846 |
| C | -5.111347 | 0.978720  | -0.120392 |
| C | -3.765351 | 1.173577  | -0.131479 |
| C | -6.154550 | 1.974733  | -0.179115 |
| C | -7.472235 | 1.707830  | -0.167358 |
| O | -6.356889 | -1.142120 | -0.039736 |
| O | 0.727071  | 3.151706  | -0.235456 |
| H | 6.450845  | -1.392600 | -0.725861 |
| H | 4.984264  | -3.658770 | -0.713073 |
| H | -2.346712 | -3.077707 | 0.944732  |
| H | -0.170355 | -4.623829 | 0.845015  |
| H | -3.236621 | 2.125113  | -0.182587 |
| H | 0.818380  | -0.808364 | -0.630266 |
| H | 2.606214  | -0.487026 | 0.625716  |
| H | 2.406167  | -4.224181 | 0.025300  |
| H | -1.140035 | 0.648789  | -0.163728 |
| H | -3.916846 | -2.067950 | -0.021785 |
| H | -5.811776 | 3.013127  | -0.237459 |
| H | -8.200599 | 2.520542  | -0.216169 |
| H | -7.845908 | 0.683134  | -0.111336 |
| H | 5.927413  | 1.199413  | 0.171345  |
| H | 4.859159  | 3.884189  | -0.437350 |
| H | 4.870734  | 3.540688  | 1.294664  |
| H | 2.230015  | 1.105901  | -0.685235 |
| H | 2.607262  | 4.350537  | 1.529199  |
| H | 2.773750  | 5.028824  | -0.090330 |

Supplementary Material (ESI) for *PCCP*  
This journal is © the Owner Societies 2009

TD-PBE0/SVP S<sub>1</sub> structure of ZsZsZa PΦB

|   |           |           |           |
|---|-----------|-----------|-----------|
| N | -3.838884 | -1.223105 | 0.062505  |
| C | -2.888916 | -0.246333 | -0.119187 |
| C | -3.584940 | 1.006521  | -0.267122 |
| C | -4.935787 | 0.785884  | -0.179338 |
| C | -5.127785 | -0.694562 | 0.014328  |
| C | -1.521196 | -0.386040 | -0.152522 |
| C | -0.755457 | -1.569354 | 0.091898  |
| C | -1.027944 | -2.781553 | 0.740540  |
| C | 0.150734  | -3.547993 | 0.745812  |
| C | 1.150352  | -2.802974 | 0.107976  |
| N | 0.581672  | -1.600771 | -0.254293 |
| C | 2.538443  | -3.102752 | -0.128673 |
| C | 3.526968  | -2.146766 | -0.219733 |
| C | 4.919964  | -2.268472 | -0.536540 |
| C | 5.490836  | -1.016523 | -0.463131 |
| C | 4.480830  | -0.079270 | -0.104267 |
| N | 3.298850  | -0.782552 | 0.002508  |
| C | 4.583192  | 1.318871  | 0.088119  |
| C | 3.527135  | 2.200504  | 0.142835  |
| N | 2.221878  | 1.875444  | -0.095915 |
| C | 1.308742  | 2.914925  | 0.031110  |
| C | 2.106077  | 4.127017  | 0.461638  |
| C | 3.574719  | 3.679830  | 0.431072  |
| O | 0.127254  | 2.790180  | -0.171956 |
| C | -5.988166 | 1.758697  | -0.261234 |
| C | -7.308200 | 1.473359  | -0.173966 |
| O | -6.144008 | -1.334943 | 0.104235  |
| H | 6.526991  | -0.756230 | -0.673367 |
| H | 5.410320  | -3.198925 | -0.817940 |
| H | -1.960649 | -3.048845 | 1.233068  |
| H | 0.290979  | -4.524925 | 1.204071  |
| H | -3.075808 | 1.961433  | -0.402010 |
| H | 0.964450  | -1.031227 | -1.000241 |
| H | 2.587300  | -0.514202 | 0.676915  |
| H | 2.831340  | -4.152254 | -0.187571 |
| H | -0.969450 | 0.534898  | -0.373024 |
| H | -3.672906 | -2.221065 | 0.075847  |
| H | -5.669611 | 2.796725  | -0.405270 |
| H | -8.051883 | 2.270594  | -0.245709 |
| H | -7.655941 | 0.447451  | -0.032633 |
| H | 5.588702  | 1.733709  | 0.178013  |
| H | 4.146497  | 4.190945  | -0.361429 |
| H | 4.108404  | 3.877001  | 1.372929  |
| H | 1.928936  | 0.975256  | -0.455019 |
| H | 1.766056  | 4.429923  | 1.464475  |
| H | 1.878097  | 4.966637  | -0.210654 |



Supplementary Material (ESI) for *PCCP*  
This journal is © the Owner Societies 2009

BP86/SVP S<sub>0</sub> structure of ZsZsZa PΦB

|   |           |           |           |
|---|-----------|-----------|-----------|
| C | 4.432074  | 3.428502  | 0.379482  |
| C | 4.084491  | 1.978843  | 0.073929  |
| N | 2.727538  | 1.925023  | -0.173254 |
| C | 2.030963  | 3.143725  | -0.012830 |
| C | 3.071651  | 4.161800  | 0.454326  |
| C | 4.943717  | 0.900448  | 0.032055  |
| C | 4.578904  | -0.474029 | -0.152443 |
| C | 5.416291  | -1.578690 | -0.484966 |
| C | 4.635031  | -2.737409 | -0.477976 |
| C | 3.294112  | -2.374647 | -0.153270 |
| N | 3.286934  | -0.973136 | 0.000125  |
| C | 2.166415  | -3.201602 | 0.000091  |
| C | 0.820108  | -2.817584 | 0.140256  |
| C | -0.296107 | -3.606700 | 0.563370  |
| C | -1.426633 | -2.792282 | 0.588468  |
| C | -1.046187 | -1.479863 | 0.148965  |
| N | 0.321031  | -1.526925 | -0.071962 |
| C | -1.771356 | -0.269149 | -0.042244 |
| C | -3.151341 | -0.087866 | -0.049413 |
| N | -4.136118 | -1.052047 | 0.033638  |
| C | -5.430212 | -0.474093 | -0.034877 |
| C | -5.186443 | 1.019896  | -0.122256 |
| C | -3.820386 | 1.201893  | -0.143328 |
| C | -6.221204 | 2.030969  | -0.174545 |
| C | -7.557058 | 1.780413  | -0.153821 |
| O | -6.467282 | -1.111966 | -0.029218 |
| O | 0.839017  | 3.267027  | -0.213216 |
| H | 6.484577  | -1.502927 | -0.720249 |
| H | 4.964014  | -3.756340 | -0.717311 |
| H | -2.419265 | -3.086323 | 0.947411  |
| H | -0.234961 | -4.658070 | 0.870675  |
| H | -3.279654 | 2.156076  | -0.198665 |
| H | 0.797132  | -0.839724 | -0.658890 |
| H | 2.622837  | -0.528126 | 0.642259  |
| H | 2.363688  | -4.284324 | 0.028080  |
| H | -1.179524 | 0.647888  | -0.199591 |
| H | -4.003008 | -2.062321 | -0.027768 |
| H | -5.863905 | 3.074100  | -0.236499 |
| H | -8.281127 | 2.608586  | -0.199436 |
| H | -7.944294 | 0.751768  | -0.093786 |
| H | 6.019050  | 1.107110  | 0.137138  |
| H | 5.075033  | 3.830391  | -0.433320 |
| H | 5.025023  | 3.503486  | 1.313073  |
| H | 2.267972  | 1.120996  | -0.607329 |
| H | 2.809079  | 4.485710  | 1.483558  |
| H | 3.006792  | 5.065690  | -0.183543 |

Supplementary Material (ESI) for *PCCP*  
This journal is © the Owner Societies 2009

TD-BP86/SVP S<sub>1</sub> structure of ZsZsZa PΦB

|   |           |           |           |
|---|-----------|-----------|-----------|
| N | -3.878703 | -1.163256 | 0.061059  |
| C | -2.932475 | -0.160529 | -0.083738 |
| C | -3.677038 | 1.080861  | -0.239334 |
| C | -5.036376 | 0.826733  | -0.190825 |
| C | -5.210330 | -0.649787 | -0.011491 |
| C | -1.555476 | -0.319932 | -0.088887 |
| C | -0.805377 | -1.526839 | 0.158420  |
| C | -1.095220 | -2.751138 | 0.802782  |
| C | 0.076231  | -3.548383 | 0.783959  |
| C | 1.094429  | -2.812567 | 0.139623  |
| N | 0.539892  | -1.581010 | -0.203601 |
| C | 2.477658  | -3.143007 | -0.124720 |
| C | 3.501988  | -2.210012 | -0.245650 |
| C | 4.888655  | -2.377731 | -0.603914 |
| C | 5.510879  | -1.135693 | -0.540705 |
| C | 4.540223  | -0.156821 | -0.148838 |
| N | 3.320743  | -0.826473 | -0.011043 |
| C | 4.695123  | 1.244992  | 0.046159  |
| C | 3.662775  | 2.171563  | 0.127624  |
| N | 2.335160  | 1.883119  | -0.095568 |
| C | 1.440183  | 2.955157  | 0.060165  |
| C | 2.290754  | 4.152581  | 0.481166  |
| C | 3.757210  | 3.656661  | 0.430743  |
| O | 0.237074  | 2.856841  | -0.115067 |
| C | -6.120843 | 1.778819  | -0.300597 |
| C | -7.444064 | 1.464241  | -0.250268 |
| O | -6.204608 | -1.352533 | 0.060857  |
| H | 6.556302  | -0.910418 | -0.782439 |
| H | 5.341430  | -3.328926 | -0.906922 |
| H | -2.027962 | -3.005262 | 1.318765  |
| H | 0.201349  | -4.539846 | 1.233197  |
| H | -3.190799 | 2.057369  | -0.362966 |
| H | 0.930705  | -1.002431 | -0.951133 |
| H | 2.643615  | -0.540508 | 0.704542  |
| H | 2.744313  | -4.207724 | -0.183498 |
| H | -0.979597 | 0.602833  | -0.282796 |
| H | -3.688494 | -2.168387 | 0.103802  |
| H | -5.818196 | 2.831335  | -0.435953 |
| H | -8.207819 | 2.250982  | -0.341065 |
| H | -7.780225 | 0.425047  | -0.120393 |
| H | 5.723866  | 1.626688  | 0.115677  |
| H | 4.342288  | 4.164287  | -0.366000 |
| H | 4.309594  | 3.830945  | 1.376304  |
| H | 2.013358  | 0.979981  | -0.451269 |
| H | 1.973419  | 4.473387  | 1.494909  |
| H | 2.080029  | 5.004507  | -0.195053 |

Supplementary Material (ESI) for *PCCP*  
This journal is © the Owner Societies 2009

B3LYP/SVP S<sub>0</sub> structure of *ZaEaZs PΦB*

|   |           |           |           |
|---|-----------|-----------|-----------|
| C | -6.657347 | 0.705953  | -0.390454 |
| C | -5.240563 | 0.736776  | -0.076362 |
| N | -4.879427 | -0.557475 | 0.278338  |
| C | -6.009137 | -1.406318 | 0.288186  |
| C | -7.147513 | -0.557307 | -0.217149 |
| C | -4.413602 | 1.831628  | -0.147581 |
| C | -2.993112 | 1.856459  | -0.011182 |
| C | -2.158690 | 2.993443  | 0.187023  |
| C | -0.844009 | 2.562572  | 0.231969  |
| C | -0.828865 | 1.150431  | 0.048903  |
| N | -2.166386 | 0.769911  | -0.077452 |
| C | 0.196708  | 0.198026  | -0.018842 |
| C | 1.580334  | 0.357238  | 0.076606  |
| C | 2.423222  | 1.486431  | 0.296398  |
| C | 3.736468  | 1.056844  | 0.304782  |
| C | 3.748654  | -0.358766 | 0.086265  |
| N | 2.445455  | -0.732400 | -0.037681 |
| C | 4.805608  | -1.316883 | 0.023349  |
| C | 6.156395  | -1.090841 | -0.048399 |
| C | 7.206626  | -2.191019 | -0.050965 |
| C | 8.559271  | -1.458876 | -0.040493 |
| C | 8.216696  | 0.017541  | -0.183392 |
| N | 6.806703  | 0.103688  | -0.146494 |
| O | 8.939148  | 0.966712  | -0.301372 |
| O | -5.989018 | -2.554991 | 0.656377  |
| C | -8.497444 | -1.025259 | -0.454041 |
| C | -8.927793 | -2.286763 | -0.257633 |
| H | 4.600841  | 1.685537  | 0.501143  |
| H | 2.088544  | 2.508283  | 0.450802  |
| H | -2.520532 | 4.013306  | 0.301150  |
| H | 0.027670  | 3.191267  | 0.389714  |
| H | -7.206906 | 1.575057  | -0.751314 |
| H | -2.466542 | -0.147967 | -0.387177 |
| H | 2.146611  | -1.683673 | -0.220110 |
| H | -0.141325 | -0.833835 | -0.171131 |
| H | -4.890221 | 2.795893  | -0.331760 |
| H | -4.091579 | -0.785658 | 0.875450  |
| H | -9.198474 | -0.266926 | -0.819338 |
| H | -9.967845 | -2.553442 | -0.460294 |
| H | -8.259621 | -3.068292 | 0.109149  |
| H | 4.506546  | -2.368375 | 0.028149  |
| H | 7.077410  | -2.813959 | -0.950918 |
| H | 7.065641  | -2.854644 | 0.815192  |
| H | 6.359366  | 1.007153  | -0.259861 |
| H | 9.118113  | -1.595114 | 0.898735  |
| H | 9.235405  | -1.752296 | -0.856519 |

Supplementary Material (ESI) for *PCCP*  
This journal is © the Owner Societies 2009

TD-B3LYP/SVP S<sub>1</sub> structure of *ZaEaZs* PΦB

|   |           |           |           |
|---|-----------|-----------|-----------|
| N | -4.879820 | -0.525050 | 0.327886  |
| C | -5.233490 | 0.770527  | -0.046097 |
| C | -6.638968 | 0.750253  | -0.357535 |
| C | -7.139502 | -0.521064 | -0.168923 |
| C | -6.007181 | -1.369215 | 0.342351  |
| C | -4.388633 | 1.859690  | -0.161275 |
| C | -2.966407 | 1.871772  | -0.066780 |
| C | -2.097330 | 2.972741  | 0.080889  |
| C | -0.784479 | 2.493746  | 0.105588  |
| C | -0.830661 | 1.081565  | -0.047264 |
| N | -2.167294 | 0.739897  | -0.125461 |
| C | 0.173899  | 0.076719  | -0.149422 |
| C | 1.548528  | 0.236063  | 0.023659  |
| C | 2.353819  | 1.353374  | 0.429991  |
| C | 3.678414  | 0.951878  | 0.441596  |
| C | 3.739749  | -0.419679 | 0.043769  |
| N | 2.442387  | -0.808839 | -0.181955 |
| C | 4.818420  | -1.337577 | -0.099431 |
| C | 6.170699  | -1.074257 | -0.101236 |
| N | 6.779830  | 0.143190  | -0.052820 |
| C | 8.193504  | 0.105745  | -0.056024 |
| C | 8.581069  | -1.366829 | -0.051608 |
| C | 7.254371  | -2.135948 | -0.182466 |
| O | 8.885794  | 1.084869  | -0.057133 |
| C | -8.488116 | -0.972315 | -0.399089 |
| C | -8.935171 | -2.235343 | -0.184983 |
| O | -5.998849 | -2.519583 | 0.717374  |
| H | 4.516182  | 1.563768  | 0.767950  |
| H | 1.978140  | 2.327955  | 0.727480  |
| H | -2.417114 | 4.008807  | 0.176831  |
| H | 0.114322  | 3.096488  | 0.192331  |
| H | -7.187165 | 1.617171  | -0.727404 |
| H | -2.500222 | -0.173439 | -0.414180 |
| H | 2.177142  | -1.727415 | -0.518501 |
| H | -0.176809 | -0.932429 | -0.389261 |
| H | -4.863789 | 2.824545  | -0.352580 |
| H | -4.085134 | -0.750600 | 0.917711  |
| H | -9.185011 | -0.214583 | -0.774935 |
| H | -9.978483 | -2.493460 | -0.384300 |
| H | -8.270276 | -3.016120 | 0.190925  |
| H | 4.548362  | -2.389814 | -0.228312 |
| H | 7.174313  | -2.667916 | -1.145662 |
| H | 7.110894  | -2.891599 | 0.605405  |
| H | 6.300468  | 1.037659  | -0.092316 |
| H | 9.115180  | -1.581487 | 0.888189  |
| H | 9.292511  | -1.555280 | -0.869127 |
